# Supplementary material for: Long Noncoding RNA AC078850.1 Induces NLRP3 Inflammasome-Mediated Pyroptosis in Atherosclerosis by Upregulating ITGB2 Transcription via Transcription Factor HIF-1α
Source: MDPI journal article supplement (doi:10.3390/biomedicines11061734), 2023-06-16
Supplement: s1 [file s1]

## Supplementary Materials

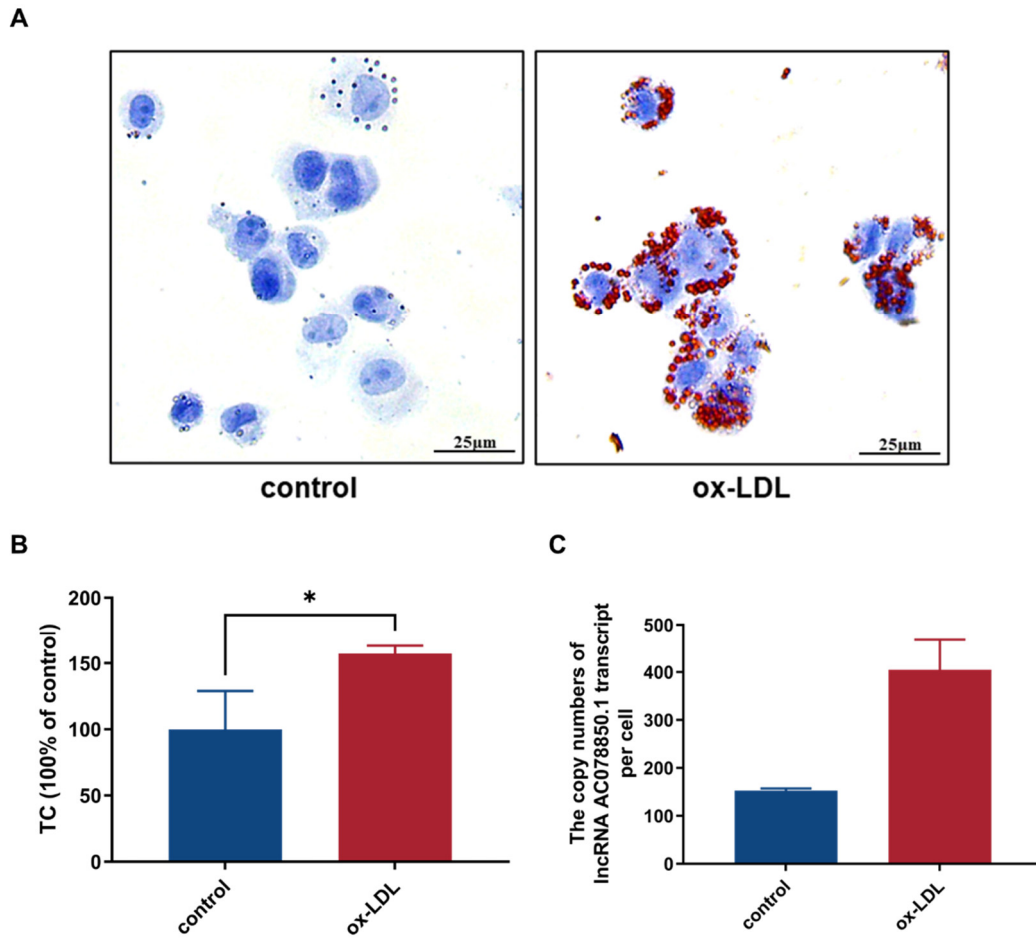

**Figure S1.** The establishment of foam cell model. **(A)** Intracellular lipid accumulation of THP-1 macrophage-derived foam cells were examined using oil red O staining ( $n = 3$ , scale bar: 25 $\mu$ m). **(B)** The TC level (100% of control) in THP-1-derived macrophages induced by ox-LDL ( $n = 3$ ). **(C)** The copy numbers of lncRNA AC078850.1 transcript per cell in THP-1-derived macrophages with or without ox-LDL induction were quantified using qRT-PCR ( $n = 3$ ). The results were obtained from three independent experiments. Measurement data were presented as mean  $\pm$  SD. Differences among groups were determined by Student's t-tests. \* $p < 0.05$ .

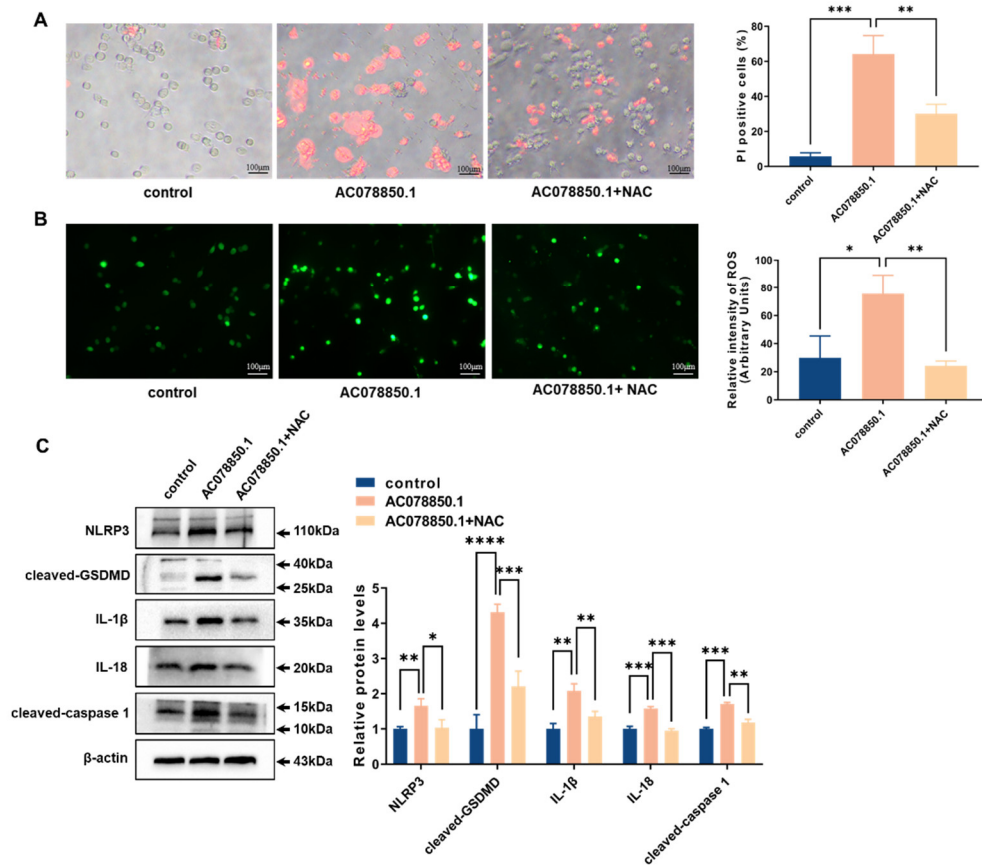

**Figure S2.** ROS inhibitor reversed lncRNA AC078850.1-induced pyroptosis in THP-1-derived macrophages. **(A)** Effect of NAC on cellular oxidative stress was examined using ROS production (n=3, scale bar=100μm). **(B)** Effect of NAC on pyroptotic cell death was performed by PI staining (n=3, scale bar=100μm). **(C)** The protein levels of NLRP3, cleaved-caspase 1, cleaved-GSDMD, IL-1β and IL-18 were determined by western blot in lncRNA AC078850.1 plasmids-induced THP-1-derived macrophages treated by NAC (n=3). The results were obtained from three independent experiments. Measurement data were presented as mean ± SD. Differences among groups were determined by Student's t-tests. \*  $p < 0.05$ , \*\*  $p < 0.01$ , \*\*\*  $p < 0.001$ , \*\*\*\*  $p < 0.0001$ , and <sup>ns</sup>  $p > 0.05$ .

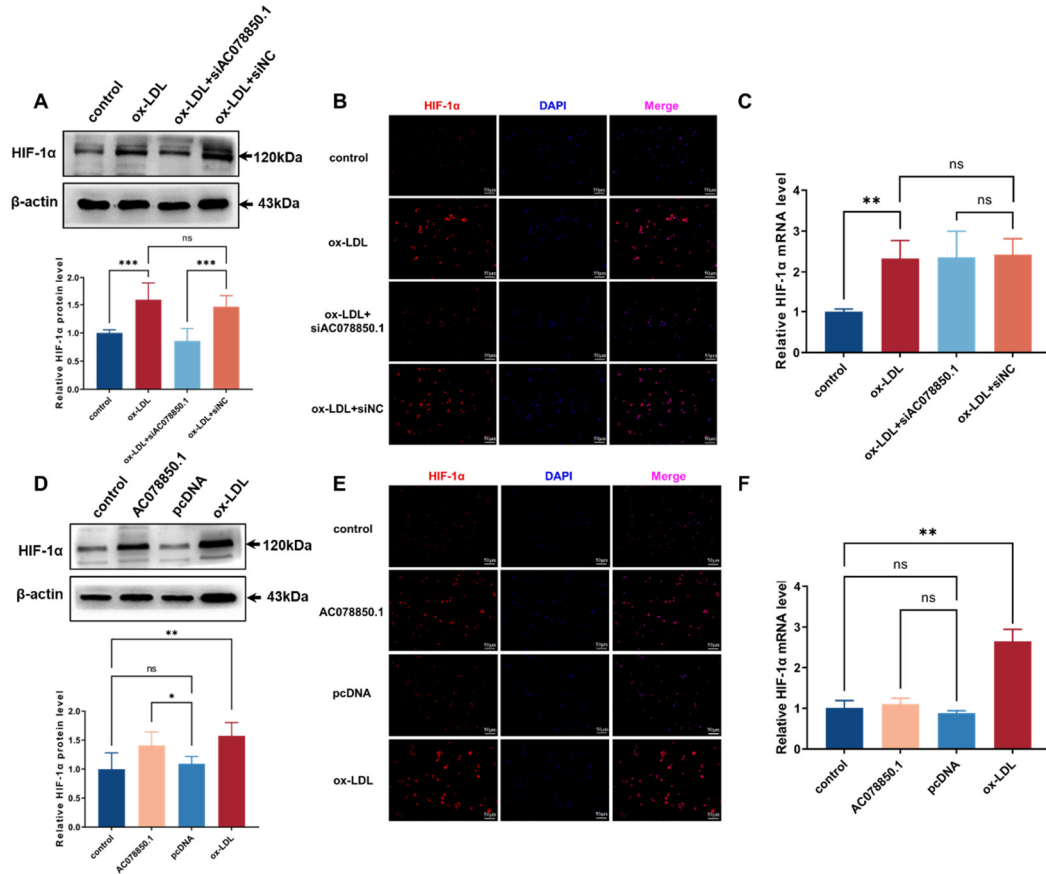

**Figure S3.** HIF-1 $\alpha$  Expression in THP-1 macrophages treated by siAC078850.1 or lncRNA AC078850.1 plasmids. **(A)** The protein level of HIF-1 $\alpha$  in THP-1 macrophage-derived foam cells treated by siAC078850.1 was determined by western blot (n = 6). **(B)** The expression level of HIF-1 $\alpha$  was detected by immunofluorescence in THP-1 macrophage-derived foam cells treated by siAC078850.1 (n = 3, scale bar: 50μm). **(C)** The mRNA expression of HIF-1 $\alpha$  in THP-1 macrophage-derived foam cells treated by siAC078850.1 was determined using qRT-PCR (n = 3). **(D)** The protein level of HIF-1 $\alpha$  in THP-1-derived macrophages treated by lncRNA AC078850.1 plasmids was determined by western blot (n = 6). **(E)** The expression level of HIF-1 $\alpha$  was detected by immunofluorescence in THP-1-derived macrophages treated by lncRNA AC078850.1 plasmids (n = 3, scale bar: 50μm). **(F)** The mRNA expression of HIF-1 $\alpha$  in THP-1-derived macrophages treated by lncRNA AC078850.1 plasmids was determined using qRT-PCR (n = 3). The results were obtained from three independent experiments at least. Measurement data were presented as mean  $\pm$  SD. Differences among groups were determined by Student's t-tests. \*  $p < 0.05$ , \*\*  $p < 0.01$ , \*\*\*  $p < 0.001$ , and <sup>ns</sup>  $p > 0.05$ .

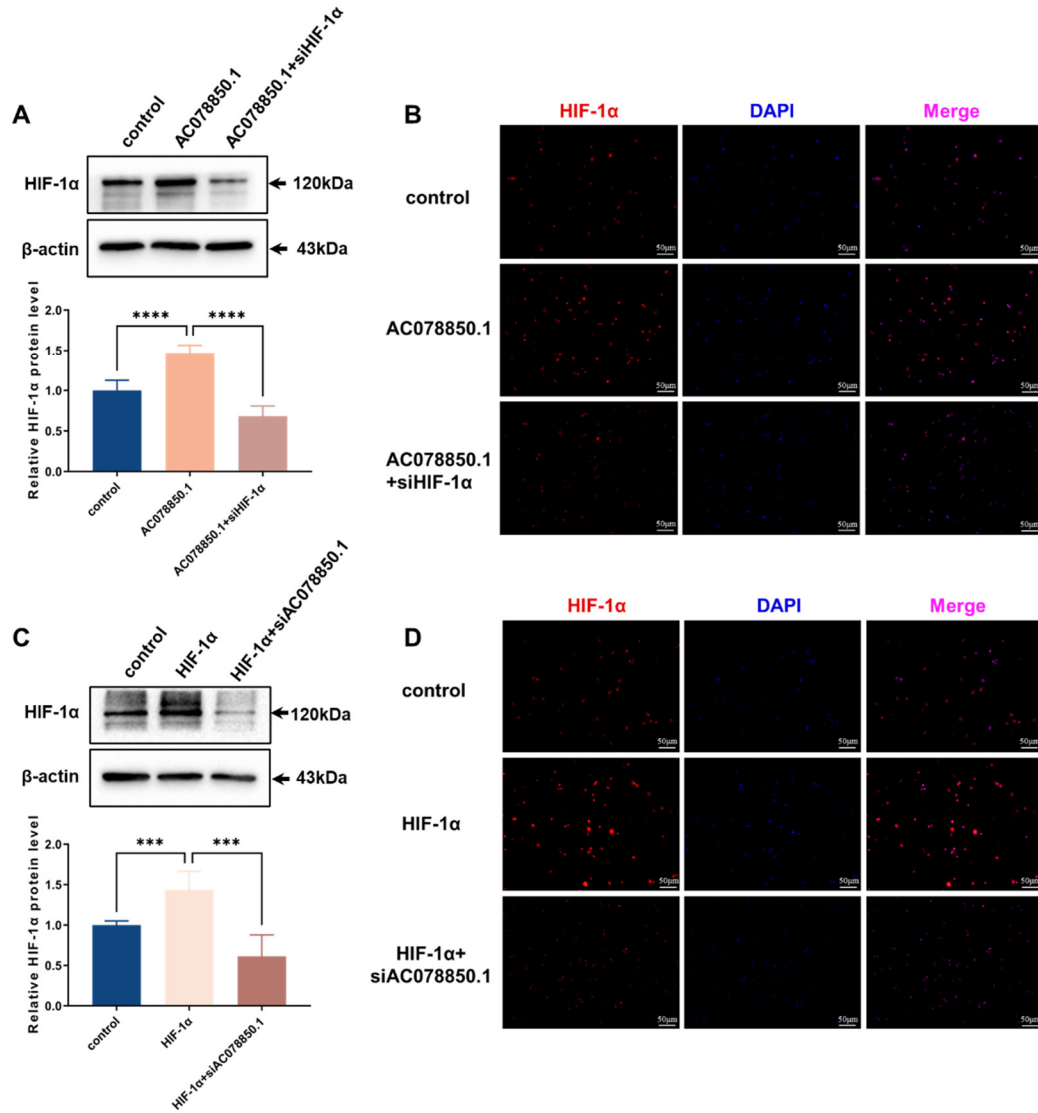

**Figure S4.** HIF-1 $\alpha$  Expression in the co-transfection experiments. **(A)** The protein level of HIF-1 $\alpha$  in the co-transfection of lncRNA AC078850.1 plasmids and siHIF-1 $\alpha$  group was determined by western blot (n = 6). **(B)** The expression level of HIF-1 $\alpha$  in the co-transfection of lncRNA AC078850.1 plasmids and siHIF-1 $\alpha$  group was detected by immunofluorescence (n = 3, scale bar: 50 $\mu$ m). **(C)** The protein level of HIF-1 $\alpha$  in the co-transfection of HIF-1 $\alpha$  plasmids and siAC078850.1 group was determined by western blot (n = 6). **(D)** The expression level of HIF-1 $\alpha$  in the co-transfection of HIF-1 $\alpha$  plasmids and siAC078850.1 group was detected by immunofluorescence (n = 3, scale bar: 50 $\mu$ m). The results were obtained from three independent experiments at least. Measurement data were presented as mean  $\pm$  SD. Differences among groups were determined by Student's t-tests. \*\*\* $p$  < 0.001, and \*\*\*\* $p$  < 0.0001.

**Table S1.** Baseline characteristics of healthy controls or patients with carotid plaque involved in this research. Data were presented as mean  $\pm$  SD or percentage. Differences among groups were determined by one-way ANOVA or fisher exact test. \*  $p < 0.05$ . LDL: low density lipoprotein. HDL: high density lipoprotein. AST: aspartate transaminase. ALT: alanine transaminase. GGT:  $\gamma$ -glutamyl transpeptidase.

| Characteristics                | Healthy control<br>N=9 | Patients with single carotid plaque<br>N=6 | Patients with multiple and stable carotid plaque<br>N=6 | Patients with multiple and unstable carotid plaque<br>N=6 | F    | P Value |
|--------------------------------|------------------------|--------------------------------------------|---------------------------------------------------------|-----------------------------------------------------------|------|---------|
| Age, years                     | 72.00 $\pm$ 12.75      | 75.67 $\pm$ 10.69                          | 71.17 $\pm$ 10.52                                       | 74.67 $\pm$ 7.92                                          | 0.24 | 0.87    |
| Male sex, n (%)                | 55.56                  | 50.00                                      | 50.00                                                   | 50.00                                                     | /    | 1.00    |
| Systolic blood pressure, mmHg  | 122.67 $\pm$ 8.50      | 134.00 $\pm$ 17.62                         | 129.33 $\pm$ 14.45                                      | 132.67 $\pm$ 17.04                                        | 0.98 | 0.42    |
| Diastolic blood pressure, mmHg | 72.11 $\pm$ 6.53       | 86.83 $\pm$ 11.34                          | 80.50 $\pm$ 7.04                                        | 79.67 $\pm$ 8.14                                          | 3.98 | 0.02*   |
| Mean arterial pressure, mmHg   | 88.96 $\pm$ 5.73       | 102.56 $\pm$ 12.89                         | 96.78 $\pm$ 9.38                                        | 97.33 $\pm$ 9.90                                          | 2.7  | 0.07    |
| Hypertension                   | 33.33                  | 66.67                                      | 50.00                                                   | 66.67                                                     | /    | 0.53    |
| Diabetes mellitus              | 33.33                  | 50.00                                      | 33.33                                                   | 33.33                                                     | /    | 0.95    |
| Hyperlipemia                   | 55.56                  | 83.33                                      | 83.33                                                   | 100.00                                                    | /    | 0.32    |
| Coronary heart disease         | 11.11                  | 50.00                                      | 66.67                                                   | 50.00                                                     | /    | 0.12    |
| Erythrocytes (%)               | 5.73 $\pm$ 1.21        | 5.72 $\pm$ 1.01                            | 5.63 $\pm$ 1.69                                         | 5.65 $\pm$ 0.96                                           | 0.12 | 1.00    |
| Neutrophils (%)                | 3.31 $\pm$ 0.98        | 3.18 $\pm$ 0.86                            | 2.86 $\pm$ 0.97                                         | 3.00 $\pm$ 0.96                                           | 0.35 | 0.79    |
| Lymphocytes (%)                | 1.78 $\pm$ 0.47        | 2.07 $\pm$ 0.46                            | 2.27 $\pm$ 1.00                                         | 2.11 $\pm$ 0.61                                           | 0.74 | 0.54    |
| Neutrophils/Lymphocytes        | 1.95 $\pm$ 0.69        | 1.60 $\pm$ 0.53                            | 1.61 $\pm$ 0.97                                         | 1.56 $\pm$ 0.69                                           | 0.49 | 0.69    |
| Glucose                        | 5.44 $\pm$ 0.80        | 5.81 $\pm$ 0.49                            | 5.97 $\pm$ 0.83                                         | 5.33 $\pm$ 0.33                                           | 1.28 | 0.30    |
| Total cholesterol, mg/dL       | 4.45 $\pm$ 0.91        | 5.14 $\pm$ 1.07                            | 4.28 $\pm$ 0.83                                         | 4.11 $\pm$ 0.66                                           | 1.57 | 0.22    |
| LDL cholesterol, mg/dL         | 2.35 $\pm$ 0.55        | 2.83 $\pm$ 0.78                            | 2.27 $\pm$ 0.56                                         | 2.16 $\pm$ 0.53                                           | 1.42 | 0.26    |
| HDL cholesterol, mg/dL         | 1.24 $\pm$ 0.28        | 1.38 $\pm$ 0.19                            | 1.16 $\pm$ 0.28                                         | 1.26 $\pm$ 0.21                                           | 0.81 | 0.50    |
| ALT (U/L)                      | 17.46 $\pm$ 5.89       | 21.85 $\pm$ 13.56                          | 21.15 $\pm$ 10.29                                       | 18.72 $\pm$ 5.88                                          | 0.37 | 0.78    |
| AST (U/L)                      | 20.10 $\pm$ 2.59       | 20.33 $\pm$ 3.85                           | 22.90 $\pm$ 8.56                                        | 21.32 $\pm$ 5.28                                          | 0.39 | 0.76    |
| AST/ALT                        | 1.25 $\pm$ 0.33        | 1.09 $\pm$ 0.34                            | 1.12 $\pm$ 0.16                                         | 1.20 $\pm$ 0.37                                           | 0.40 | 0.76    |
| GGT (U/L)                      | 29.93 $\pm$ 14.79      | 35.18 $\pm$ 23.43                          | 27.62 $\pm$ 11.03                                       | 24.33 $\pm$ 5.21                                          | 0.55 | 0.58    |

**Table S2.** The abundance of lncRNA AC078850.1 in THP-1-derived macrophages with or without ox-LDL induction.

| Samples   | LncRNA AC078850.1 copies/cell |
|-----------|-------------------------------|
| control_1 | 148.91                        |
| control_2 | 157.53                        |
| control_3 | 151.88                        |
| ox-LDL_1  | 377.86                        |
| ox-LDL_2  | 359.75                        |
| ox-LDL_3  | 476.64                        |
